# Supplementary material
Source: PubMed Central journal article supplement (PMC6715844)
Supplement: AEM.01237-19-s0001.pdf [file AEM.01237-19-s0001.pdf]

## Supplemental files

### Global analysis of furfural-induced genomic instability using yeast model

Lei Qi<sup>1, #</sup>, Ke Zhang<sup>2, #</sup>, Yu-Ting Wang<sup>1</sup>, Jian-Kun Wu<sup>1</sup>, Yang Sui<sup>1</sup>, Xiao-Zhuan Liang<sup>3</sup>, Lin-Zi Yu, Xue-Chang Wu<sup>2</sup>, Pin-Mei Wang<sup>1</sup>, Jin-Zhong Xu<sup>1</sup> and Dao-Qiong Zheng<sup>1,\*</sup>

<sup>1</sup>Ocean College, Zhejiang University, Zhoushan 316021, China

<sup>2</sup>College of Life Science, Zhejiang University, Hangzhou 310058, China

<sup>3</sup>Zhejiang University City College, Hangzhou 310015, China

**Running title:** Furfural induced genome instability

<sup>#</sup>These authors contributed equally to this work.

\*Corresponding author: zhengdaoqiong@zju.edu.cn (DQZ) or  
xujinzhong@zju.edu.cn

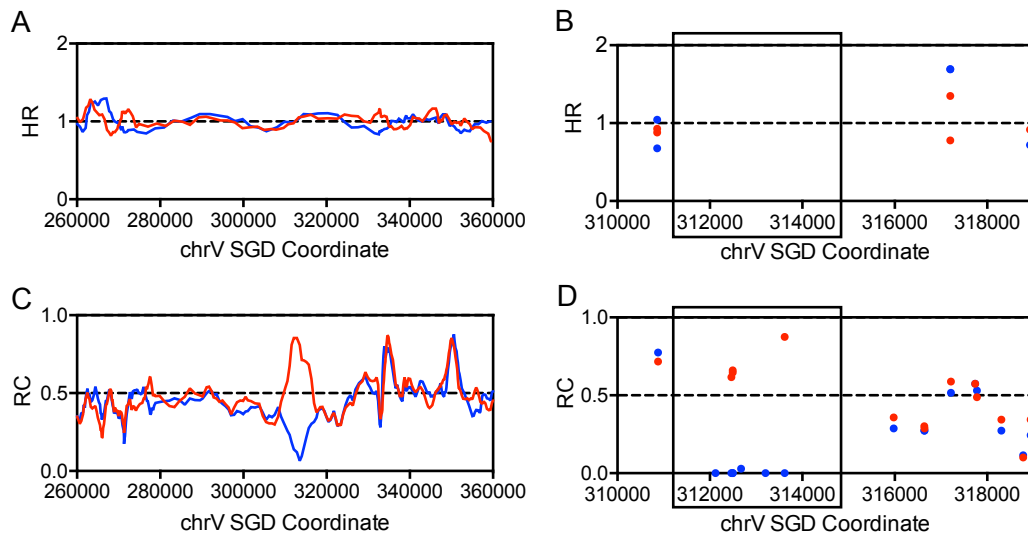

**Fig. S1. A new gene conversion event detected by whole genome sequencing.** Red and blue lines/points represent normalized hybridization ratio of genomic DNA to YJM789-derived and W303-1A-derived SNPs. (A) High- and (B) low-resolution depiction of the 260 kb to 360 kb region of chromosome V in QLF11 detected by SNP microarray. (C) High- and (D) low-resolution depiction of same region detected by whole genome sequencing.

**Table S1** New LOH events detected in the 7 sequenced JSC25-derived isolates

| Colony name | NO.  | Chr  | Event type | Class <sup>a</sup> | Markers flanking transitions |        | Event window |        |
|-------------|------|------|------------|--------------------|------------------------------|--------|--------------|--------|
|             |      |      |            |                    | Left                         | Right  | Left         | Right  |
| QLF2        | 1    | II   | CON        | b1                 | 18175                        | 18513  | 18175        | 19557  |
|             |      |      |            |                    | 19218                        | 19557  |              |        |
|             | 2    | IV   | CON        | b1                 | 117925                       | 117968 | 117925       | 118488 |
|             |      |      |            |                    | 117968                       | 118488 |              |        |
|             | 3    | VII  | CON        | b1                 | 648198                       | 649406 | 648198       | 653157 |
|             |      |      |            |                    | 650619                       | 653157 |              |        |
| 4           | VIII | CON  | b2         | 211729             | 212293                       | 211729 | 212499       |        |
|             |      |      |            | 212293             | 212499                       |        |              |        |
| 5           | XVI  | CON  | b1         | 377336             | 377648                       | 377336 | 377765       |        |
|             |      |      |            | 377648             | 377765                       |        |              |        |
| QLF5        | 6    | XIII | CON        | b1                 | 132751                       | 132818 | 132751       | 152476 |
|             |      |      |            |                    | 152033                       | 152476 |              |        |
| QLF8        | 7    | IV   | CON        | b2                 | 317793                       | 320064 | 317793       | 321142 |
|             |      |      |            |                    | 320064                       | 321142 |              |        |
| QLF11       | 8    | V    | CON        | b1                 | 310877                       | 312122 | 310877       | 315976 |
|             |      |      |            |                    | 313619                       | 315976 |              |        |
|             | 9    | VII  | CON        | b1                 | 20940                        | 20941  | 20940        | 21081  |
|             |      |      |            |                    | 21077                        | 21081  |              |        |
| 10          | XIII | CON  | b2         | 149883             | 150027                       | 149883 | 150108       |        |
|             |      |      |            | 150027             | 150108                       |        |              |        |
| QLF18       | 11   | VII  | CON        | b1                 | 742148                       | 747273 | 742148       | 751202 |
|             |      |      |            |                    | 751065                       | 751202 |              |        |
|             | 12   | X    | CON        | b1                 | 196634                       | 197018 | 196634       | 206537 |
| 204641      |      |      |            |                    | 206537                       |        |              |        |
| QLF19       | 13   | V    | CON        | b2                 | 169761                       | 171549 | 169761       | 173217 |
|             |      |      |            |                    | 171549                       | 173217 |              |        |
|             | 14   | VII  | CON        | b1                 | 360816                       | 361541 | 360816       | 364120 |
|             |      |      |            |                    | 362516                       | 364120 |              |        |
|             | 15   | VIII | CON        | b2                 | 369183                       | 369483 | 369183       | 370842 |
|             |      |      |            |                    | 370707                       | 370842 |              |        |
| 16          | IX   | CON  | b2         | 405945             | 405973                       | 405945 | 409106       |        |
|             |      |      |            | 408244             | 409106                       |        |              |        |
| 17          | XI   | CON  | b2         | 634031             | 634150                       | 634031 | 638417       |        |
|             |      |      |            | 637017             | 638417                       |        |              |        |

<sup>a</sup> LOH classes were depicted in Dataset S4.

**Table S2.** Small DNA changes detected in 7 sequenced JSC25-derived isolates

| No. | Isolates | chromosome | Location | Reference | Mutations |
|-----|----------|------------|----------|-----------|-----------|
| 1   | QLF5     | chr2       | 328607   | C         | T         |
| 2   | QLF5     | chr2       | 529698   | T         | C         |
| 3   | QLF5     | chr7       | 127766   | A         | AT        |
| 4   | QLF5     | chr10      | 101417   | A         | G         |
| 5   | QLF5     | chr15      | 490308   | T         | C         |
| 6   | QLF5     | chr16      | 354387   | C         | A         |
| 7   | QLF8     | chr2       | 108598   | G         | A         |
| 8   | QLF8     | chr9       | 127612   | A         | C         |
| 9*  | QLF8     | chr11      | 356900   | C         | T         |
| 10  | QLF8     | chr15      | 408037   | G         | C         |
| 11  | QLF11    | chr2       | 100815   | C         | T         |
| 12* | QLF11    | chr7       | 431798   | T         | C         |
| 13  | QLF11    | chr7       | 585208   | T         | C         |
| 14  | QLF11    | chr8       | 13021    | C         | T         |
| 15  | QLF18    | chr2       | 410711   | C         | T         |
| 16  | QLF18    | chr9       | 383036   | G         | A         |
| 17  | QLF18    | chr11      | 580901   | G         | A         |
| 18  | QLF18    | chr13      | 863678   | C         | T         |
| 19  | QLF18    | chr15      | 505667   | C         | T         |
| 20  | QLF18    | chr16      | 431727   | C         | A         |
| 21  | QLF19    | chr8       | 405975   | C         | A         |
| 22  | QLF19    | chr10      | 122651   | T         | C         |
| 23* | QLF19    | chr13      | 35335    | G         | A         |
| 24* | QLF19    | chr15      | 205706   | T         | C         |
| 25  | QLF19    | chr16      | 479612   | G         | A         |
| 26  | QLF1     | chr8       | 378808   | G         | A         |
| 27  | QLF1     | chr15      | 197651   | T         | A         |
| 28  | QLF1     | chr16      | 744245   | C         | T         |
| 29  | QLF1     | chr2       | 779167   | GA        | G         |
| 30* | QLF2     | chr2       | 550748   | G         | A         |
| 31  | QLF2     | chr2       | 550749   | G         | A         |
| 32  | QLF2     | chr11      | 137099   | T         | C         |
| 33  | QLF2     | chr12      | 715373   | T         | C         |

\*These SNVs were also verified by Sanger sequencing.
